# Supplementary material for: Synthesis and bioactivity of a novel surfactin-based lipopeptide for mRNA delivery
Source: Royal Society of Chemistry journal article supplement (doi:10.1039/d4na00404c), 2024-01-01
Supplement: d4na00404c1.pdf [file d4na00404c1.pdf]

## SUPPORTING INFORMATION

### **Synthesis and Bioactivity of a Novel Surfactin-Based Lipopeptide for mRNA Delivery**

Mohammed S. Alqahtani,<sup>\*ab</sup> Rabbani Syed,<sup>ab</sup> Ali S. Alqahtani,<sup>c</sup> Omer M. Almarfadi,<sup>c</sup> Monzurul A. Roni,<sup>d</sup> Satya S. Sadhu<sup>e</sup>

<sup>a</sup>*Department of Pharmaceutics, College of Pharmacy, King Saud University, Riyadh 11451, Saudi Arabia*

<sup>b</sup>*Nanomedicine & Biotechnology Research Unit, Department of Pharmaceutics, College of Pharmacy, King Saud University, Riyadh 11451, Saudi Arabia*

<sup>c</sup>*Department of Pharmacognosy, College of Pharmacy, King Saud University, Riyadh 11451, Saudi Arabia*

<sup>d</sup>*Department of Health Sciences Education and Pathology, University of Illinois College of Medicine, Peoria, IL 61605, USA*

<sup>e</sup>*Chemistry Department, Northern Michigan University, 1401, Presque, Isle, Marquette, MI 49855, USA*

\* Corresponding Author: Phone: +(966)1467-7362, Fax: +(966)1467-6295  
Email address: msaalqahtani@ksu.edu.sa

**Table S1:** Physicochemical characterization of mRNA OleSurf-LNPs stored at 4°C for up to two months. Particle size and PDI were measured by DLS, while mRNA encapsulation efficiency and mRNA concentration were determined by the RiboGreen assay

| <b>Time (weeks)</b> | <b>Average size (nm) ± SD</b> | <b>PDI ± SD</b> | <b>[mRNA]<br/>mg/mL</b> | <b>EE (%) ± SD</b> |
|---------------------|-------------------------------|-----------------|-------------------------|--------------------|
| <b>0</b>            | 84.91 ± 6.24                  | 0.102 ± 0.025   | 0.48 ± 0.01             | 90.51 ± 3.72       |
| <b>1</b>            | 85.26 ± 5.16                  | 0.093 ± 0.013   | 0.45 ± 0.04             | 94.89 ± 1.59       |
| <b>2</b>            | 84.79 ± 3.89                  | 0.111 ± 0.018   | 0.49 ± 0.06             | 92.75 ± 3.85       |
| <b>4</b>            | 87.79 ± 2.02                  | 0.097 ± 0.014   | 0.48 ± 0.00             | 91.71 ± 4.92       |
| <b>8</b>            | 85.21 ± 5.86                  | 0.105 ± 0.017   | 0.44 ± 0.05             | 93.66 ± 2.01       |

DLS, Dynamic light scattering; PDI, polydispersity; EE, encapsulation efficiency.
